# Supplementary material for: Investigating Bacteriophages Targeting the Opportunistic Pathogen Acinetobacter baumannii
Source: MDPI journal article supplement (doi:10.3390/antibiotics9040200), 2020-04-22
Supplement: s1 [file s1]

## 1 Supplementary Materials

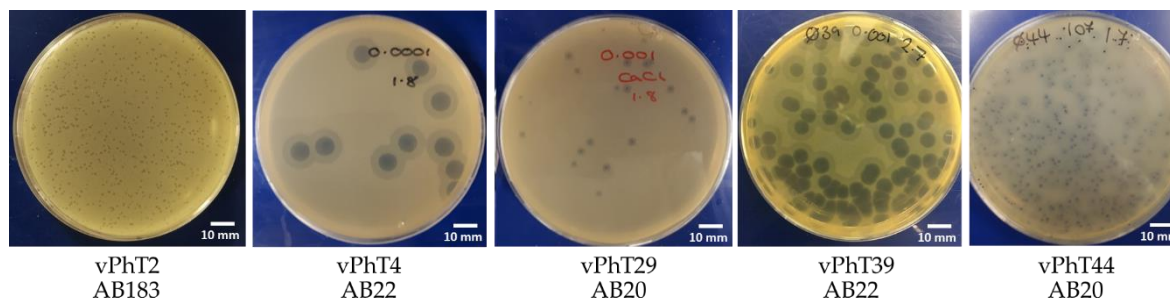

**Figure S1.** Morphology of plaques formed by bacteriophages on a lawn of *Acinetobacter baumannii* hosts after overnight incubation.

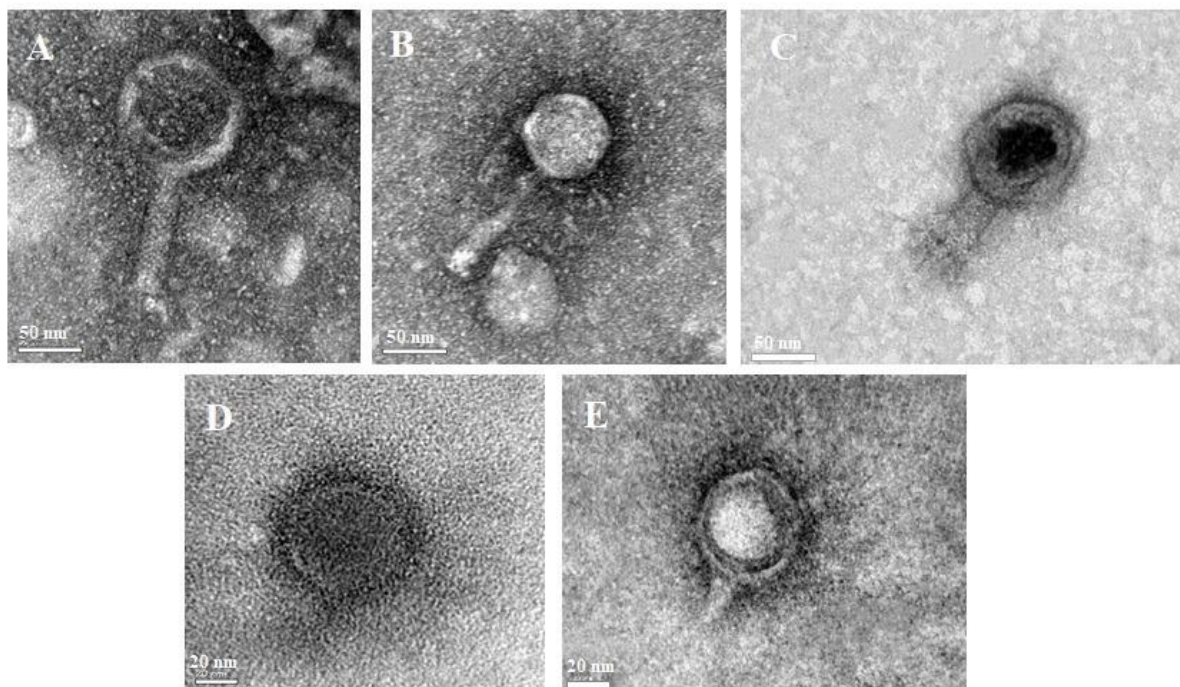

**Figure S2:** Transmission Electron Micrographs of *A. baumannii* bacteriophages. (A) vPhT2 (previous name ØABP02), (B) vPhT4 (previous name ØABP04) and (C) vPhT44 (previous name ØABP44) belonging to the *Myoviridae* family. (D) vPhT29 (previous name ØABP29) and (E) vPhT39 (previous name ØABP39) belonging to the *Podoviridae* family. The phages were negatively stained with 2% uranyl-acetate. Bar corresponds to 50 nm. (A, B, C) and 20 nm. (D, E).

Table S1: Details on clinical sources of *Acinetobacter baumannii* host strains.

| <i>A. baumannii</i> host strain | Hospital location      | Number of beds | Isolation year | Specimen type | Ward type |
|---------------------------------|------------------------|----------------|----------------|---------------|-----------|
| AB20                            | Central Thailand (HA)  | 653            | 2013           | Sputum        | ICU       |
| AB22                            | Central Thailand (HA)  | 653            | 2013           | Wound         | General   |
| AB183                           | Northern Thailand (HC) | 756            | 2014           | Sputum        | ICU       |

(ICU = intensive care unit).

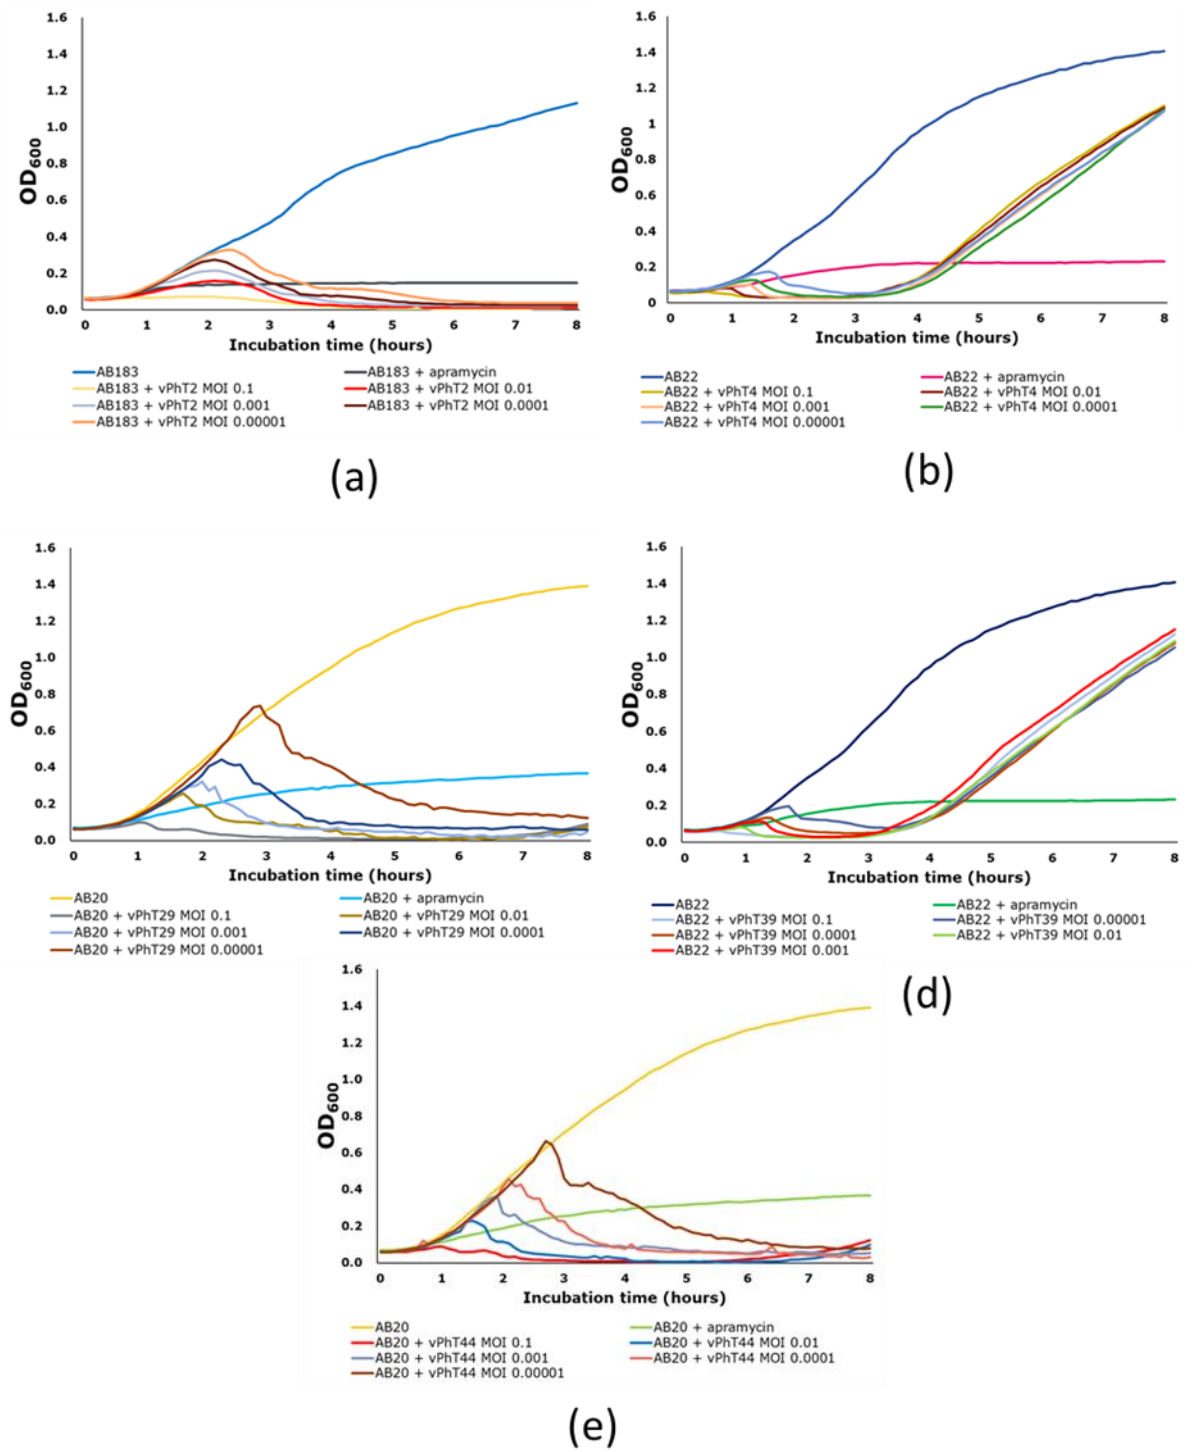

**Figure S3a-e.** Eight-hour growth curve for *Acinetobacter baumannii* strains grown with bacteriophages added at different multiplicity of infections (MOIs). Data displayed as OD<sub>600</sub> (N=3). (a) vPhT2, (b) vPhT4, (c) vPhT29, (d) vPhT39, (e) vPhT44.

**Table S2.** Logarithmic titre of bacteriophage vPhT2 after storage in SM buffer II for 14 days in different temperature and light conditions.

| Storage location                    | Bacteriophage recovery at each time point (log <sub>10</sub> PFU/mL ± SD) |              |             |             |             |
|-------------------------------------|---------------------------------------------------------------------------|--------------|-------------|-------------|-------------|
|                                     | 0 days                                                                    | 1 day        | 3 days      | 8 days      | 14 days     |
| Fridge (4 °C)                       | 10.13 ± 0.15                                                              | 10.03 ± 0.25 | 9.46 ± 0.00 | 8.55 ± 0.06 | 7.53 ± 0.61 |
| Room temperature (21 °C)            | N/A                                                                       | 9.80 ± 0.03  | 9.33 ± 0.41 | 8.26 ± 0.10 | 7.18 ± 0.69 |
| Room temperature (21 °C) with light | N/A                                                                       | 9.81 ± 0.10  | 9.45 ± 0.06 | 8.20 ± 0.46 | 7.38 ± 0.22 |
| Freezer (-20 °C)                    | N/A                                                                       | 8.14 ± 0.20  | 7.39 ± 0.03 | 6.54 ± 0.41 | 5.90 ± 0.14 |
| Biological incubator (37 °C)        | N/A                                                                       | 9.33 ± 0.32  | 8.55 ± 0.14 | 6.25 ± 0.17 | 5.24 ± 0.46 |

N/A = not applicable. PFU = plaque forming units. SD = standard deviation.

**Table S3:** Minimum inhibitory concentrations (MICs) of antibiotics against *Acinetobacter baumannii* host strains, as established from a broth microdilution method.

| Antibiotic  | MIC value (µg/mL) |      |       | Susceptibility cut off <sup>1</sup> | Resistance cut off <sup>1</sup> |
|-------------|-------------------|------|-------|-------------------------------------|---------------------------------|
|             | AB20              | AB22 | AB183 | ≤ µg/mL                             | > µg/mL                         |
| Meropenem   | 32                | 32   | 256   | 2                                   | 8                               |
| Colistin    | 1                 | 2    | 1     | 2                                   | 2                               |
| Apramycin   | 16                | 16   | 32    | No data                             | No data                         |
| Tigecycline | 1                 | 2    | 1     | No data                             | No data                         |

<sup>1</sup>Clinical breakpoints are taken from those defined by the European Committee on Antimicrobial Susceptibility Testing (EUCAST)[1,2].

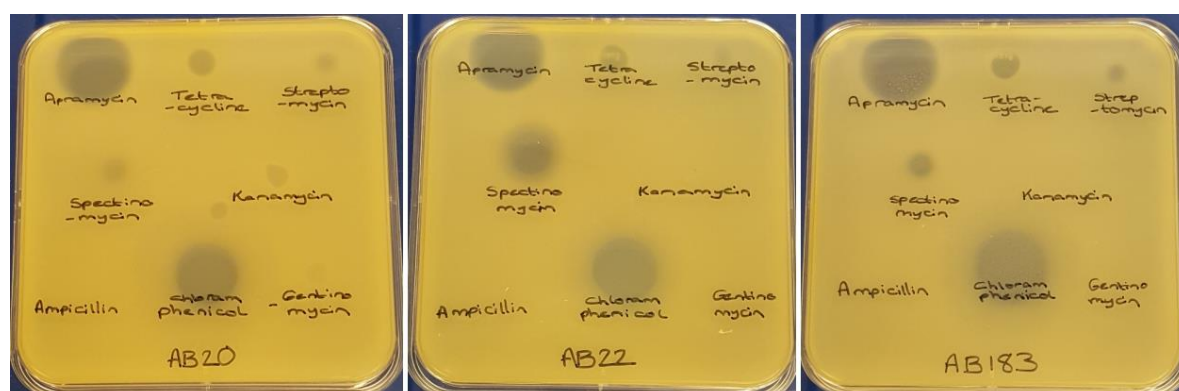

**Figure S4:** Photo of drop test screen for zones of inhibition caused by a range of antibiotics against *Acinetobacter baumannii* strains.

## References

- 30 1. Hasselmann, C. Determination of minimum inhibitory concentrations (MICs) of antibacterial agents by  
31 broth dilution. *Clin. Microbiol. Infect.* **2003**, *9*, ix–xv.
- 32 2. EUCAST The European Committee on Antimicrobial Susceptibility Testing. Breakpoint tables for  
33 interpretation of MICs and zone diameters. Version 9.0, 2019. Available online: <http://www.eucast.org>  
34 (accessed on Sep 9, 2019).

35
